# Supplementary material
Source: publisher figshare collection journal article supplement (https://gsajournals.figshare.com/ndownloader/files/27743253)
Supplement: Supplementary file 1 [file 27743253]

| **Table S1.** *Hypomesus nipponensis* genome sequencing. | | |
| --- | --- | --- |
| **Sequencing type** | **Yields** | **Length of reads** |
| Sequel (>20Kb) | 58.60Gbp | 5.7M |
| Novaseq6000 (2x101bp) | 36.99Gbp | 366.2M |
